# Supplementary material for: Rescuing AAV gene transfer from neutralizing antibodies with an IgG-degrading enzyme
Source: PubMed Central journal article supplement (PMC7566709; doi:10.1172/jci.insight.139881), 2020-09-17
Supplement: jciinsight-5-139881-s116.pdf [file jciinsight-5-139881-s116.pdf]

## Supplementary Information

### Rescuing AAV gene transfer from neutralizing antibodies with an IgG-degrading enzyme

Zachary C. Elmore<sup>1</sup>, Daniel K. Oh<sup>1</sup>, Katherine E. Simon<sup>1</sup>, Marco M. Fanous<sup>1</sup>, Aravind  
Asokan<sup>1,2,3,4\*</sup>

<sup>1</sup>Department of Surgery, <sup>2</sup>Department of Molecular Genetics & Microbiology, Duke University  
School of Medicine, Durham, NC, USA, <sup>3</sup>Department of Biomedical Engineering, <sup>4</sup>Regeneration  
Next, Duke University, Durham, NC, USA

\*Corresponding Author: Aravind Asokan, Ph.D.

5148, MSRB3,

3 Genome Court,

Durham NC 27710, USA

Email: [aravind.asokan@duke.edu](mailto:aravind.asokan@duke.edu)

## Supplementary Figures

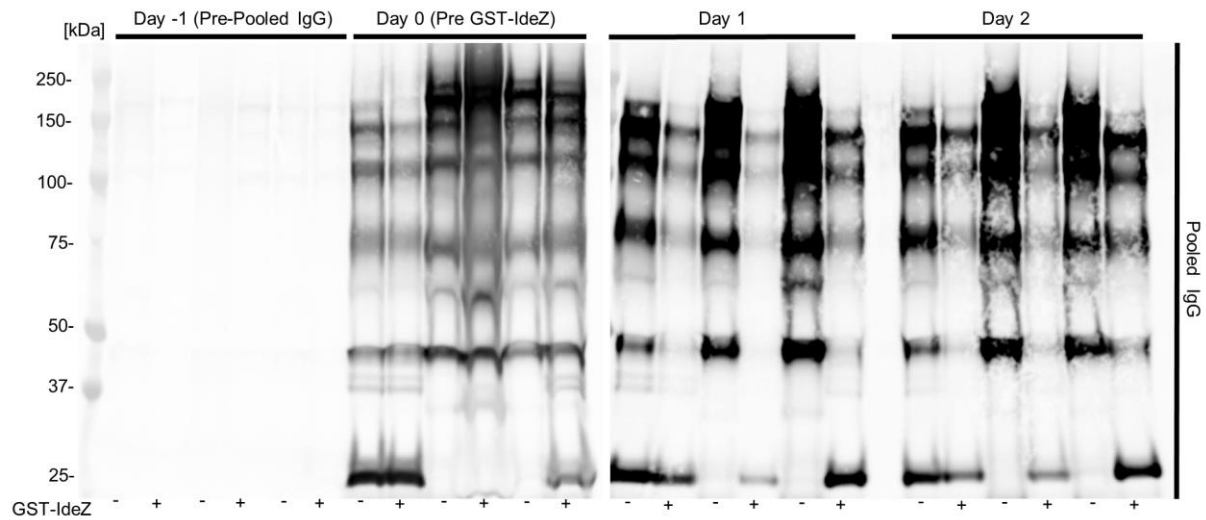

**Supplemental Fig 1. Kinetic analysis of IdeZ mediated cleavage of pooled human IgG *in vivo*.** Mice were injected intraperitoneally with pooled human IgG. The same mice were injected intravenously 24 hours later with PBS (-) or recombinant GST-IdeZ (2.5 mg/kg) (+). Blood samples were taken 24 and 48 hours post injection and analyzed by SDS-PAGE under reducing conditions and probed with human IgG specific antibodies to analyze IgG cleavage.

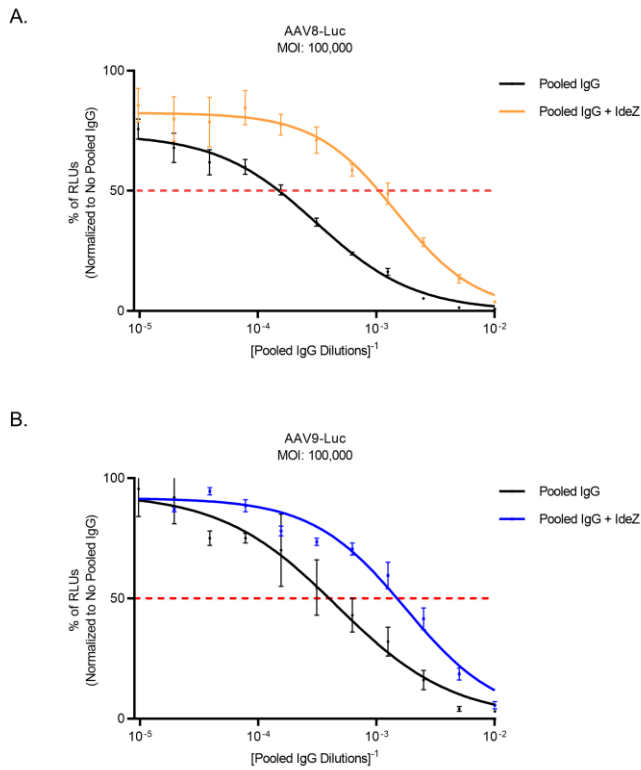

**Supplemental Fig 2. IdeZ mitigates human IgG mediated neutralization of AAV8 and AAV9 *in vitro*.**

Pooled human IgG was treated with PBS or GST-IdeZ (1ug). Samples were then serially diluted in twofold increments from 1:100 to 1:102,400 and then co-incubated with AAV8-Luc (**A**), or AAV9-Luc (**B**) *in vitro* (100,000 vg/cell). The dotted red line represents NAb-mediated inhibition of AAV8/9 transduction by 50%. Solid lines represent relative transduction efficiencies of AAV8/9 incubated with IgG (black) and AAV8/9 incubated with IgG treated with GST-IdeZ (yellow,blue) at different dilutions. Error bars represent SEM (AAV8,  $n = 3$ ) (AAV9,  $n=2$ ).

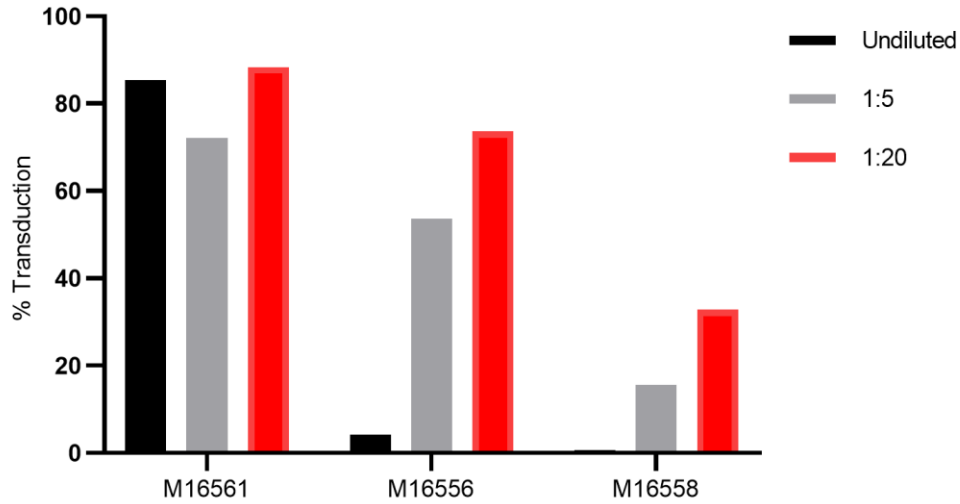

**Supplemental Fig 3. AAV9 neutralization profile of NHP sera.** NHP sera from three individual animals (M16561, M16556, M16558) were diluted from 1:5 to 1:20 and then coincubated with AAV9-Luc *in vitro* (100,000 vg/cell). Transduction levels were normalized to no serum control.

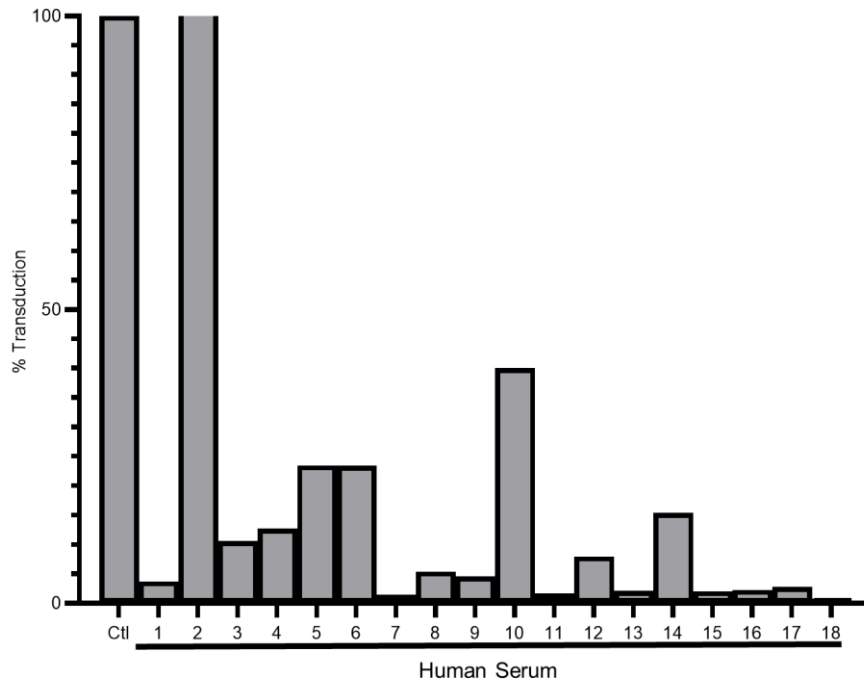

**Supplemental Fig 4. AAV9 neutralization profile of human sera.** Human sera from 18 individuals was diluted 1:5 and then coincubated with AAV9-Luc *in vitro* (100,000 vg/cell). Transduction levels were normalized to no serum control. Luciferase activity was determined at 24 hrs post-transduction. Detailed methods are described in Tse *et al.*, PNAS, 2017.

**Supplemental Table 1. Demographic analysis of human serum used in this study.**

| <b>Serum #</b> | <b>Lot #</b> | <b>Gender</b> | <b>Age</b> | <b>Race</b> |
|----------------|--------------|---------------|------------|-------------|
| 1              | BRH1499625   | Male          | 37         | Hispanic    |
| 2              | BRH1499636   | Male          | 32         | Black       |
| 3              | BRH1499659   | Female        | 22         | Black       |
| 4              | BRH1499617   | Male          | 32         | Black       |
| 5              | BRH1499665   | Female        | 35         | Hispanic    |
| 6              | BRH1499637   | Male          | 37         | Caucasian   |
| 7              | BRH1536076   | Male          | 11         | Caucasian   |
| 8              | BRH1499666   | Female        | 27         | Black       |
| 9              | BRH1499685   | Female        | 35         | Caucasian   |
| 10             | BRH1499676   | Female        | 35         | Caucasian   |
| 11             | BRH1499638   | Male          | 30         | Caucasian   |
| 12             | BRH1499620   | Male          | 21         | Hispanic    |
| 13             | BRH1536073   | Female        | 16         | Black       |
| 14             | BRH1499645   | Male          | 34         | Caucasian   |
| 15             | BRH1499679   | Female        | 33         | Caucasian   |
| 16             | BRH1499647   | Male          | 35         | Caucasian   |
| 17             | BRH1499669   | Female        | 23         | Hispanic    |
| 18             | BRH1499660   | Female        | 35         | Hispanic    |
